# Supplementary material for: Implementation and Sustainability of an Enhanced Pulmonary Rehabilitation Program in a Single Centre
Source: Research Square preprint supplement (doi:10.21203/rs.3.rs-100937/v1), 2020-11-05
Supplement: Supplementary file 1 [file 69d336a7c3483854295a16f1.docx]

**Additional file 4: Data from surveys for HCPs and patients**

Table A. Results of the survey for the patients in the implementation phase.

| Questions | Mean ± 95% CI | SD |
| --- | --- | --- |
| 1. How satisfied were you with the amount of practical information used in the education sessions? | 9.9 ± 0.2 | 0.3 |
| 1. How satisfied were you with the content of the education sessions? | 10.0 ± 0.0 | 0.0 |
| 1. How satisfied were you with the content of the written materials given? | 9.0 ± 2.1 | 3.2 |
| 1. How approachable was/were the healthcare professional(s) who delivered the education sessions? | 10.0 ± 0.0 | 0.0 |
| 1. How accessible was the location of the education sessions | 8.9 ± 2.0 | 2.9 |
| Total mean | 9.5 | 0.9 |

*Abbreviations: CI=confidence interval, SD=standard deviation*

Table B. Results of survey for patients in the sustainability phase.

| Items* | Satisfaction+ | | | | | |
| --- | --- | --- | --- | --- | --- | --- |
| *Very satisfied* | *Satisfied* | *Neutral* | *Not satisfied* | *Very unsatisfied* | *Not applicable* |
| 1. Overall satisfaction with program | 5/6 (83) | - | 1/6 (17) | - | - | - |
| 1. Satisfaction with group education sessions | 3/6 (50) | 1/6 (17) | 1/6 (17) | - | - | - |
| 1. Satisfaction with individual education sessions | 3/6 (50) | - | 2/6 (67) | - | - | 1/6 (17) |
| 1. Satisfaction with exercise sessions | 6/6 (100) | - | - | - | - | - |
| 1. Satisfaction with interaction with HCP’s from the program | 4/6 (67) | 2/6 (33) | - | - | - | - |

**item number of the survey as portrayed in Additional file 3.
+Proportion of N (%)*

Table C. Results of the survey for health care professionals in the initial implementation phase.

| Questions | Mean + 95% CI | SD |
| --- | --- | --- |
| 1. How satisfied were you with the introduction of the program that you received? | 6.7 ± 2.2 | 2.8 |
| 1. How satisfied were you with the content of the education sessions that you were asked to teach | 8.7 ± 1.0 | 1.4 |
| 1. How satisfied were you with the facilitator notes and resources provided for the education sessions | 6.4 ± 2.7 | 3.4 |
| 1. How satisfied were you with the time allotted for your education session(s) | 9.3 ± 0.6 | 1.0 |
| 1. How likely would you be to recommend the education program (content, resources, structure) to another pulmonary rehabilitation programs? | 9.4 ± 0.5 | 0.8 |
| Total mean | 8.1 | 1.4 |

*Abbreviations: CI=confidence interval, SD=standard deviation*

Table D. Outcomes of the Determinants of Implementation Behaviour Questionnaire (DIBQ) based on the Theoretical Domains Framework (TDF)

| TDF Domain | Definition | Example of statement in the questionnaire | Frequencies N (%) | | |
| --- | --- | --- | --- | --- | --- |
| *Agree* | *Neutral* | *Disagree* |
| Knowledge | An awareness of the existence of something. | I know how to deliver Pulmonary Rehabilitation following the standards of the Enhanced PR program. | 7 (100%) | 0 (0%) | 0 (0%) |
| Skills | An ability or proficiency acquired through practice. | I have been trained in delivering Pulmonary Rehabilitation following the standards of the Enhanced PR program. | 6 (85.7%) | 1 (14.3%) | 0 (0%) |
| Social/ professional role & identity | A coherent set of behaviors and displayed personal qualities of an individual in a social or work setting. | As a health care professional in the PEP program, it is my job to deliver Pulmonary Rehabilitation following the standards of the Enhanced PR program. | 7 (100%) | 0 (0%) | 0 (0%) |
| Beliefs about capabilities | Acceptance of the truth, reality, or validity about an ability, talent, or facility that a person can put to constructive use. | I am confident that I can deliver Pulmonary Rehabilitation following the standards of the Enhanced PR program. | 6 (85.7%) | 1 (14.3%) | 0 (0%) |
| Optimism | The confidence that things will happen for the best or that desired goals will be attained. | In my work as a health care professional in the PEP program, in uncertain times, I usually expect the best. | 7 (100%) | 0 (0%) | 0 (0%) |
| Beliefs about consequences | Acceptance of the truth, reality, or validity about outcomes of a behavior in a given situation. | For me, delivering Pulmonary Rehabilitation following the standards of the Enhanced PR program is. (Very worthwhile – not worthwhile at all) | 7 (100%) | 0 (0%) | 0 (0%) |
| Intentions | A conscious decision to perform a behavior or a resolve to act in a certain way. | I intend to continue delivering Pulmonary Rehabilitation following the standards of the Enhanced PR program in the future. | 7 (100%) | 0 (0%) | 0 (0%) |
| Goals | Mental representations of outcomes or end states that an individual wants to achieve. | How often is working on something else on your agenda a higher priority than delivering Pulmonary Rehabilitation following the standards of the Enhanced PR program? (Always – never) | 2 (28.6%) | 1 (14.3%) | 4 (57.1%) |
| Innovation | Any characteristics of the innovation that discourages or encourages the development of skills and abilities, independence, social competence, and adaptive behavior. | Pulmonary Rehabilitation is compatible with daily practice. | 5 (71.4%) | 2 (28.6%) | 0 (0%) |
| Socio-political context | Any characteristics of the socio-political context that discourages or encourages the development of skills and abilities, independence, social competence, and adaptive behavior. | Government and local authorities provide sufficient support to interventions such as Pulmonary Rehabilitation. | 1 (20%) | 2 (40%) | 2 (40%) |
| Organization | Any characteristics of the organization that discourages or encourages the development of skills and abilities, independence, social competence, and adaptive behavior. | In the organization I work, all necessary resources are available to deliver Pulmonary Rehabilitation. | 6 (85.7%) | 1 (14.3%) | 0 (0%) |
| Patient | Any characteristics of the patient that discourages or encourages the development of skills and abilities, independence, social competence, and adaptive behavior. | Participants of Pulmonary Rehabilitation are positive about Pulmonary Rehabilitation. | 5 (71.4%) | 2 (28.6%) | 0 (0%) |
| Innovation strategies | Any characteristics of the innovation strategy that discourages or encourages the development of skills and abilities, independence, social competence, and adaptive behavior. | The Montréal Chest Institute provides sufficient intervention materials. | 5 (71.4%) | 2 (28.6%) | 0 (0%) |
| Social influences | Those interpersonal processes that can cause individuals to change their thoughts, feelings, or behaviors. | Most people who are important to me think that I should deliver Pulmonary Rehabilitation following the standards of the Enhanced PR program. | 7 (100%) | 0 (0%) | 0 (0%) |
| Positive emotions | A complex positive reaction pattern, involving experiential, behavioral, and physiological elements, by which the individual attempts to deal with a personally significant matter or event. | When I work with Pulmonary Rehabilitation I feel optimistic. | 7 (100%) | 0 (0%) | 0 (0%) |

| Negative emotions | A complex negative reaction pattern, involving experiential, behavioral, and physiological elements, by which the individual attempts to deal with a personally significant matter or event. | When I work with Pulmonary Rehabilitation I feel nervous. | 6 (85.7%) | 0 (0%) | 1 (14.3%) |
| --- | --- | --- | --- | --- | --- |
| Behavioral regulation | Anything aimed at managing or changing objectively observed or measured actions. | I have a clear plan of how I will deliver Pulmonary Rehabilitation following the standards of the Enhanced PR program. | 5 (71.4%) | 2 (28.6%) | 0 (0%) |
| Nature of the behaviors | The nature of the aggregate of all responses made by an individual in any situation. | Delivering Pulmonary Rehabilitation following the standards of the Enhanced PR program is something I do automatically. | 5 (71.4%) | 2 (28.6%) | 0 (0%) |
